# Supplementary material for: A hybrid material of vanadium nitride and nitrogen-doped graphene for lithium storage
Source: Royal Society of Chemistry journal article supplement (doi:10.1039/c1jm11710f), 2011-01-01
Supplement: c1jm11710f.pdf [file c1jm11710f.pdf]

## **A hybrid material of vanadium nitride and nitrogen-doped graphene for lithium storage**

Kejun Zhang<sup>a+</sup>, Haibo Wang<sup>a+</sup>, Xiaoqing He<sup>b,+</sup>, Zhihong Liu<sup>a</sup>, Li Wang<sup>a, c</sup>, Lin Gu<sup>b, \*</sup>, Hongxia Xu<sup>a</sup>, Pengxian Han<sup>a</sup>, Shanmu Dong<sup>a</sup>, Chuanjian Zhang<sup>a</sup>, Jianhua Yao<sup>a</sup>, Guanglei Cui<sup>a, \*</sup>

<sup>a</sup> Qingdao Institute of Bioenergy and Bioprocess Technology, Chinese Academy of Sciences, Qingdao 266101, P.R. China

<sup>b</sup> Beijing National Laboratory for Condensed Matter Physics, Institute of Physics, Chinese Academy of Sciences, Beijing 100080, China.

<sup>c</sup> Ocean University of China, Qingdao 266003, P.R.China

<sup>+</sup> These authors contributed to the work equally.

---

\* Corresponding author. Tel.: +86 532 80662746; fax: +86 532 80662744.

*E-mail address:* [cuiGL@qibebt.ac.cn](mailto:cuiGL@qibebt.ac.cn) (G.L. Cui), [l.gu@iphy.ac.cn](mailto:l.gu@iphy.ac.cn) (L. Gu).

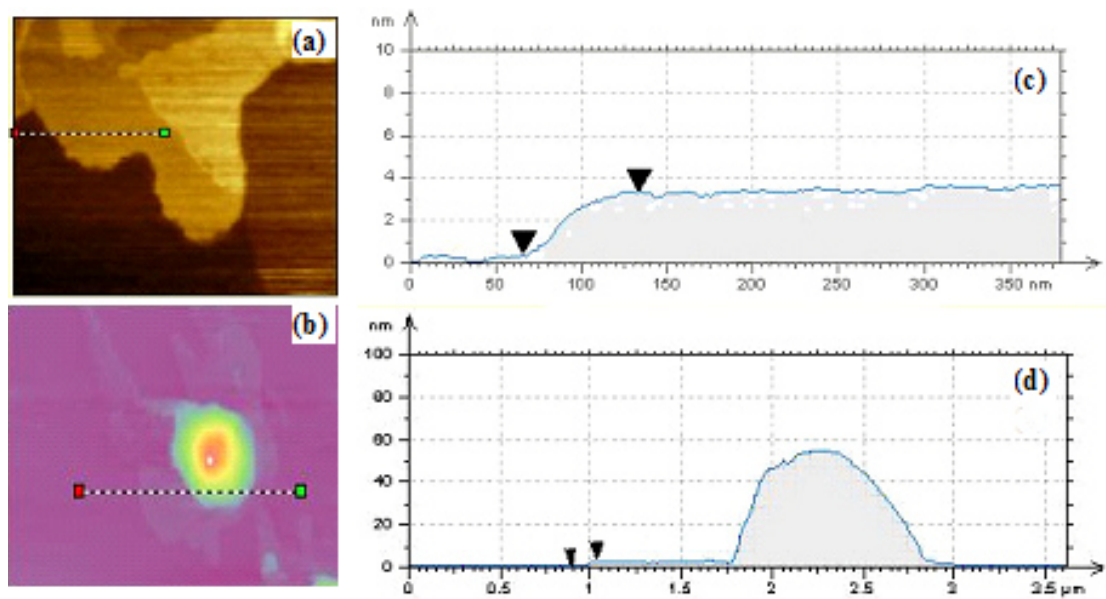

Fig. S1 Tapping-mode AFM images and corresponding height profiles of G derived from (a) and (c) VN-G-30% after a long time of sonication, (b) and (d) VN-G-30% after a short time of sonication. The thickness of the G is around 3.2 nm.

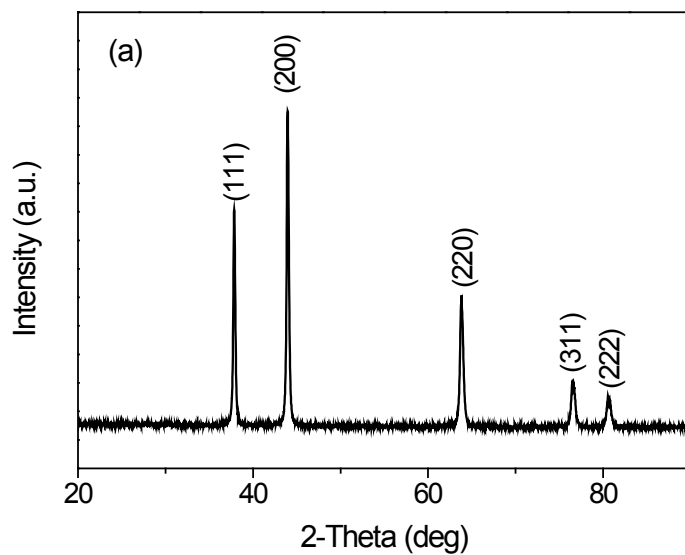

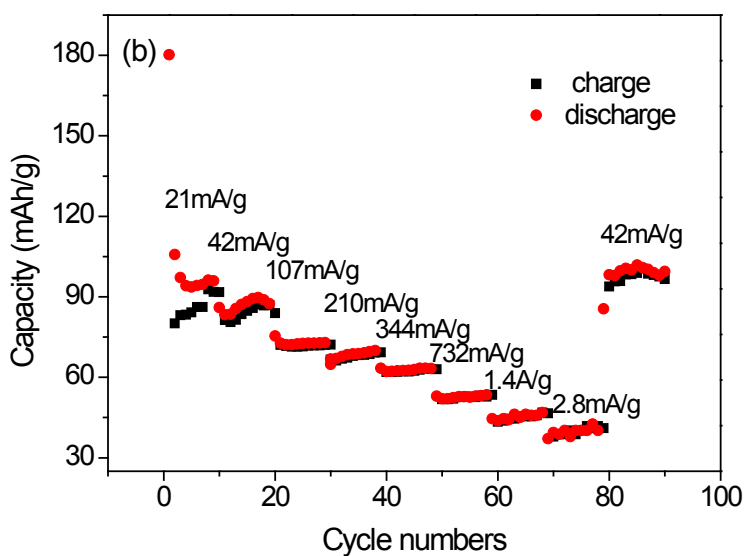

Fig. S2 XRD pattern and rate performance of of bulk VN prepared from commercial  $V_2O_5$  cycled in EC/DMC solution containing 1 M  $LiPF_6$

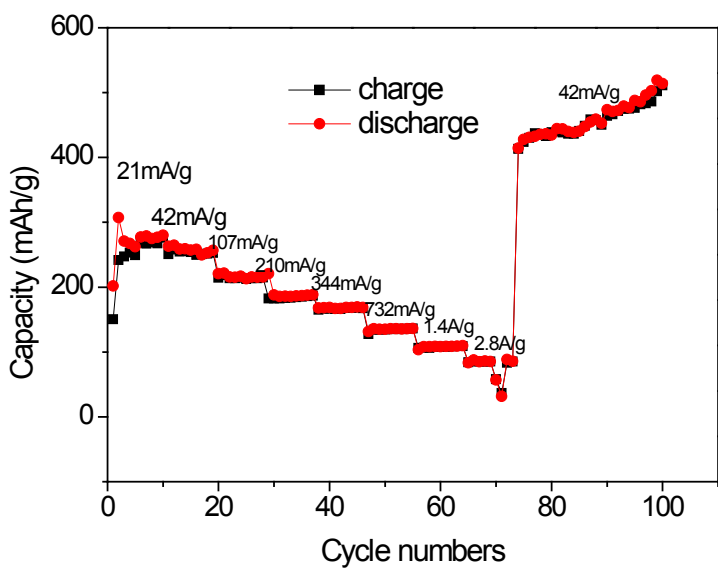

Fig. S3 Cycling and rate performance of VN-G-30% hybrid electrode cycled in EC/DMC solution containing 1 M  $LiPF_6$ .

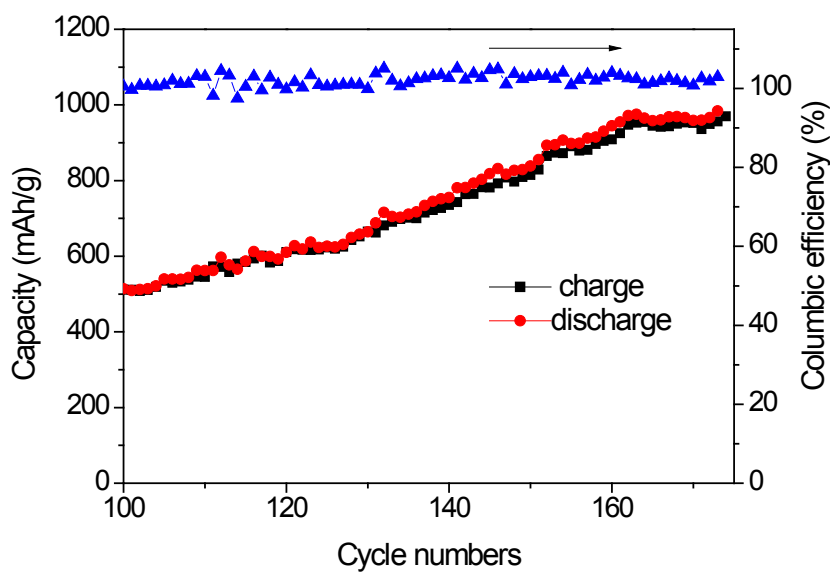

Fig. S4 Cyclic performance and coulombic efficiency of the VN-G-30% hybrid electrode cycled in EC/DMC solution containing 1 M LiPF<sub>6</sub> after rate performance.

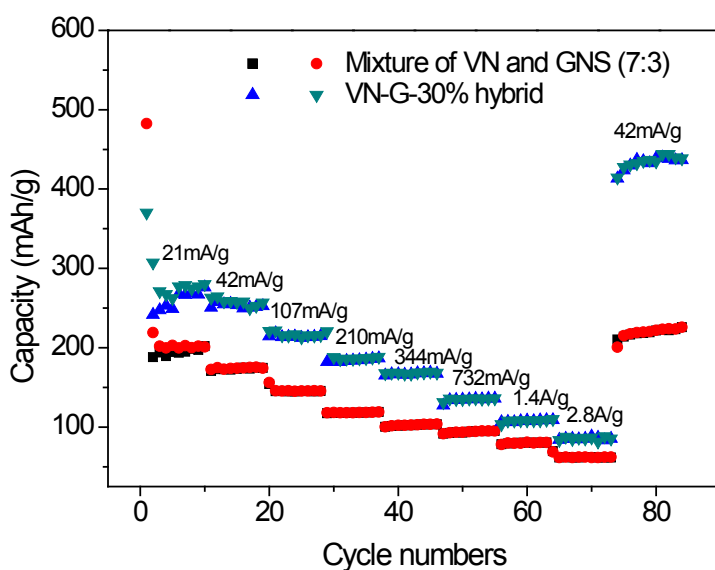

Fig. S5 Rate performances of VN-G-30% hybrid material, and a simple mixture of VN and G (7:3) electrodes cycled in EC/DMC solution containing 1 M LiPF<sub>6</sub>.
